# Supplementary material for: Harnessing Human Placental Membrane‐Derived Bioinks: Characterization and Applications in Bioprinting and Vasculogenesis
Source: PubMed Central journal article supplement (PMC11469061; doi:10.1002/adhm.202303370), 2023-11-20
Supplement: ADHM-13-2303370-s002.pdf [file ADHM-13-2303370-s002.pdf]

# ADVANCED HEALTHCARE MATERIALS

## Supporting Information

for *Adv. Healthcare Mater.*, DOI 10.1002/adhm.202303370

Harnessing Human Placental Membrane-Derived Bioinks: Characterization and Applications in Bioprinting and Vasculogenesis

*Léo Comperat, Lise Chagot, Sarah Massot, Marie-Laure Stachowicz, Nathalie Dusserre, Chantal Médina, Théo Desigaux, Jean-William Dupuy, Jean-Christophe Fricain and Hugo Oliveira\**

Supporting Information

**Harnessing human placental membrane-derived bioinks: Characterization and applications in bioprinting and vasculogenesis**

*Léo Comperat<sup>1,2</sup>, Lise Chagot<sup>1,2</sup>, Sarah Massot<sup>1,2</sup>, Marie-Laure Stachowicz<sup>1,2</sup>, Nathalie Dusserre<sup>1,2</sup>, Chantal Médina<sup>1,2</sup>, Théo Desigaux<sup>1,2</sup>, Jean-William Dupuy<sup>3</sup>, Jean-Christophe Fricain<sup>1,2,4</sup>, Hugo Oliveira<sup>1,2</sup> \**

1 University of Bordeaux, Tissue Bioengineering, U1026, F-33076 Bordeaux, France

2 Inserm U1026, Tissue Bioengineering, ART BioPrint, F-33076 Bordeaux, France

3 CHU Bordeaux, Services d'Odontologie et de Santé Buccale, F-33076 Bordeaux, France

E-mail: hugo.de-oliveira@inserm.fr

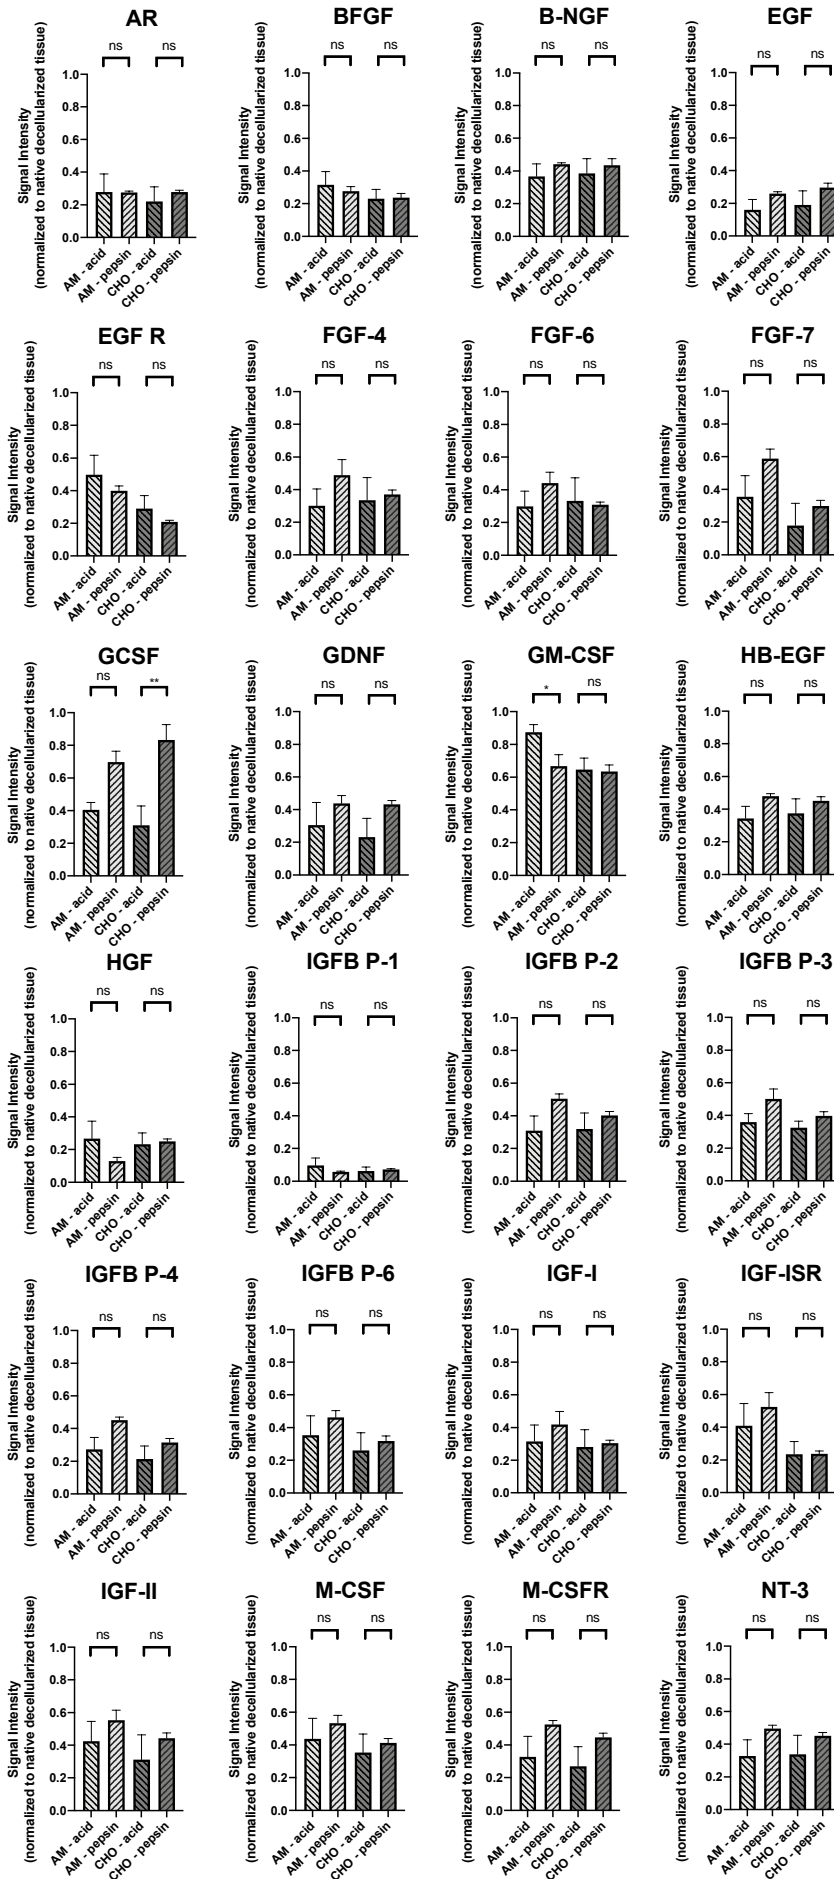

**Figure S2 A-** Relative quantification of 41 human growth factors present in decellularized human amniotic membrane (AM) or decellularized human chorion (CHO) extracts, obtained using an acidic or enzymatic (pepsin) methodology, and expressed as signal intensity normalized to the correspondent native decellularized tissue. Average values compiled from 3 independent membrane donors (n=3). \* and \*\* denote  $p < 0.05$  and  $p < 0.01$ , respectively. ns denotes non-significant.

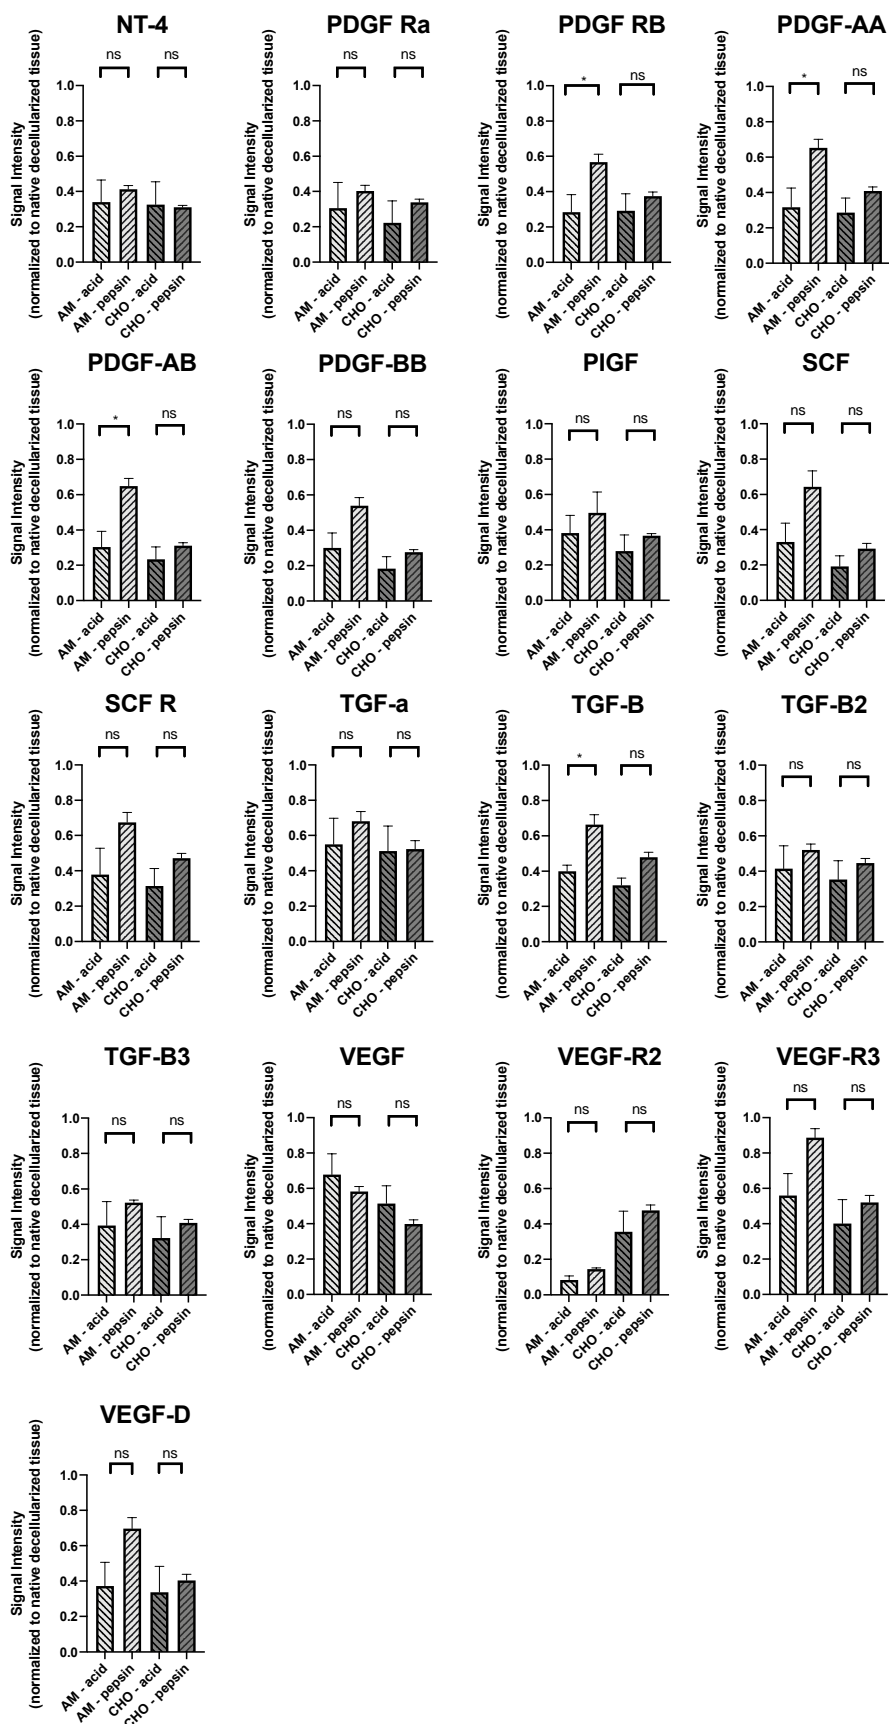

**Figure S2 B-** Relative quantification of 41 human growth factors present in decellularized human amniotic membrane (AM) or decellularized human chorion (CHO) extracts, obtained using an acidic or enzymatic (pepsin) methodology, and expressed as signal intensity

normalized to the correspondent native decellularized tissue. Average values compiled from 3 independent membrane donors (n=3). \* and \*\* denote  $p < 0.05$  and  $p < 0.01$ , respectively. ns denotes non-significant.

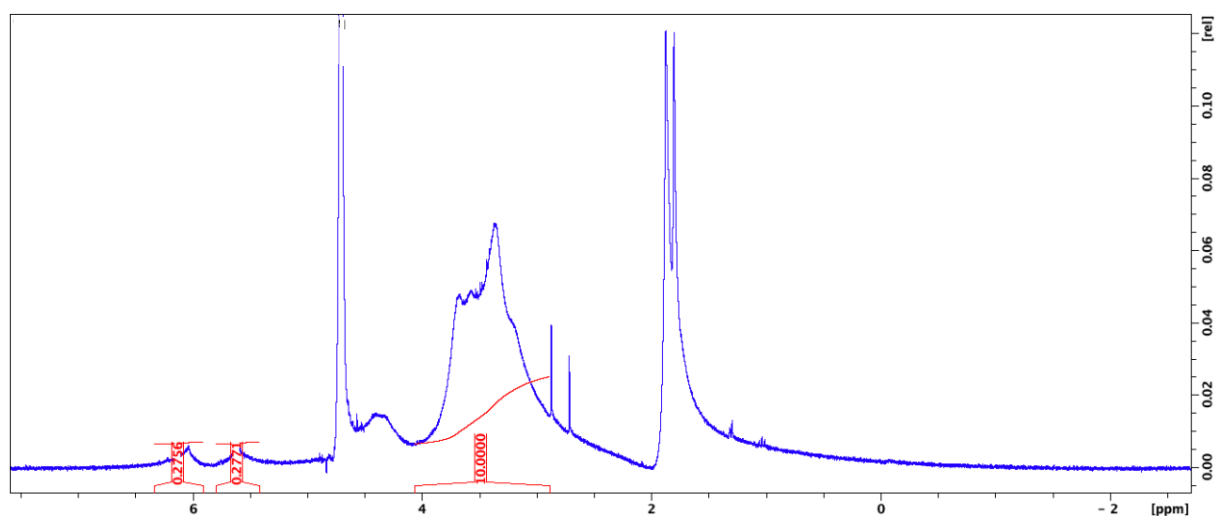

**Figure S3-**  $^1\text{H}$  NMR spectrum of methacrylated hyaluronic acid (HAMA) in  $\text{D}_2\text{O}$ . Methacrylate modification as determined by integration of the vinyl singlets (1H each, shaded green) relative to the ring of hyaluronic acid (10H, shaded grey).

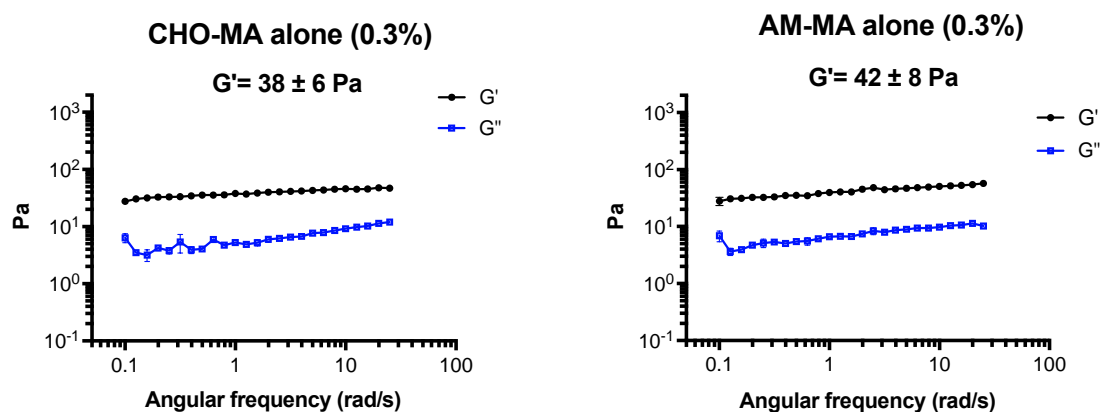

**Figure S4-** Rheological characterization of polymerized methacrylated chorionic membrane (CHO-MA alone) (0.3% w/v), or methacrylated amniotic membrane (AM-MA alone) (0.3% w/v). All compositions contained 0.1 % (w/v) of LAP (Lithium phenyl-2,4,6-trimethylbenzoylphosphinate) as photoinitiator. Storage modulus ( $G'$ ) of each formulation is indicated in the figures (Aver $\pm$ SD, n=3).

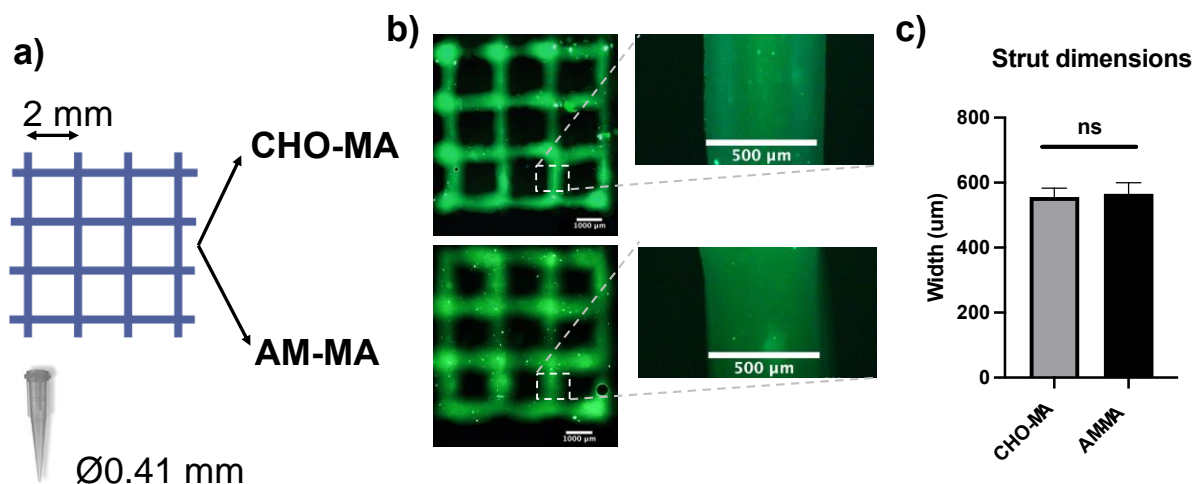

**Figure S5-** a) Schematic representation of the tested geometry, consisting on a 4 by 4 grid, with 2mm interline distance and using a 0.41 mm diameter conical tip. b) Fluorescence microscopy images of grid geometries fabricated using 2 distinct biomaterial inks, Hya-MA (1.5% w/v) + methacrylated chorionic membrane (0.3% w/v) composite (CHO-MA), or Hya-MA (1.5% w/v) + methacrylated amniotic membrane (0.3% w/v) composite (AM-MA ink). Both inks contained 0.15 % w/v of photoinitiator LAP and 0.1% of FITC Dextran (70 KDa, D1823, ThermoFisher). c) Strut width was determined by image analysis using ImageJ and plotted as Width (Aver $\pm$ SD, ns denotes non-significant).

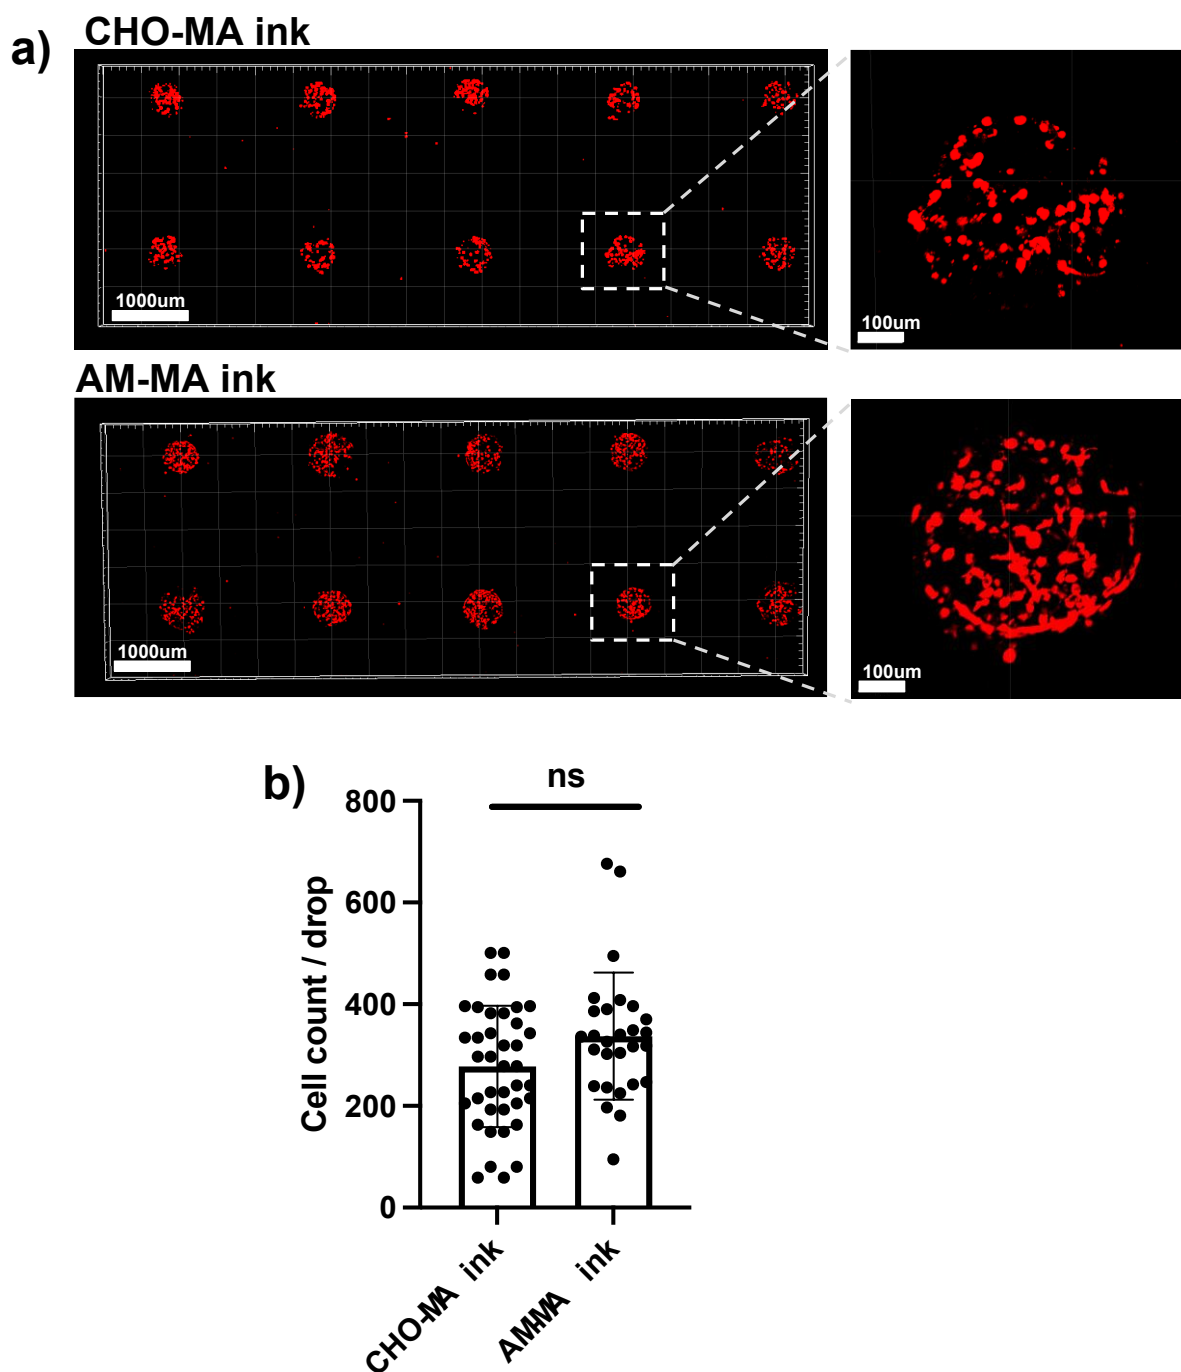

**Figure S6-** a) Confocal imaging of microvalve bioprinted RFP<sup>+</sup> human umbilical vein endothelial cells (HUVECs, red), with 2 distinct biomaterial inks, composed by methacrylated chorionic membrane (0.3% w/v, CHO-MA ink), or methacrylated amniotic membrane (0.3% w/v, AM-MA ink), one day post bioprinting. Both inks contained 0.15 % w/v of photoinitiator LAP. Bioprinting considered the use of the 3D Discovery bioprinting platform (RegenHU, SWZ) with a 300 µm diameter microvalve, HUVECs were printed at 20 millions/mL in 0.3% w/v CHO-MA or AM-MA inks with pressure= 0.020 MPa, valve opening time at 150 µs and a distance to the substrate of 2 mm. Droplet interdistance was of 1.5 mm and followed by a 1 min 365 nm UV photopolymerization. Cells were cultured in EGM-2



MV medium (Lonza, France). b) Cell number by droplet was quantified using image analysis (Imaris) and plotted as cell count per drop (Aver $\pm$ SD, ns denotes non-significant).

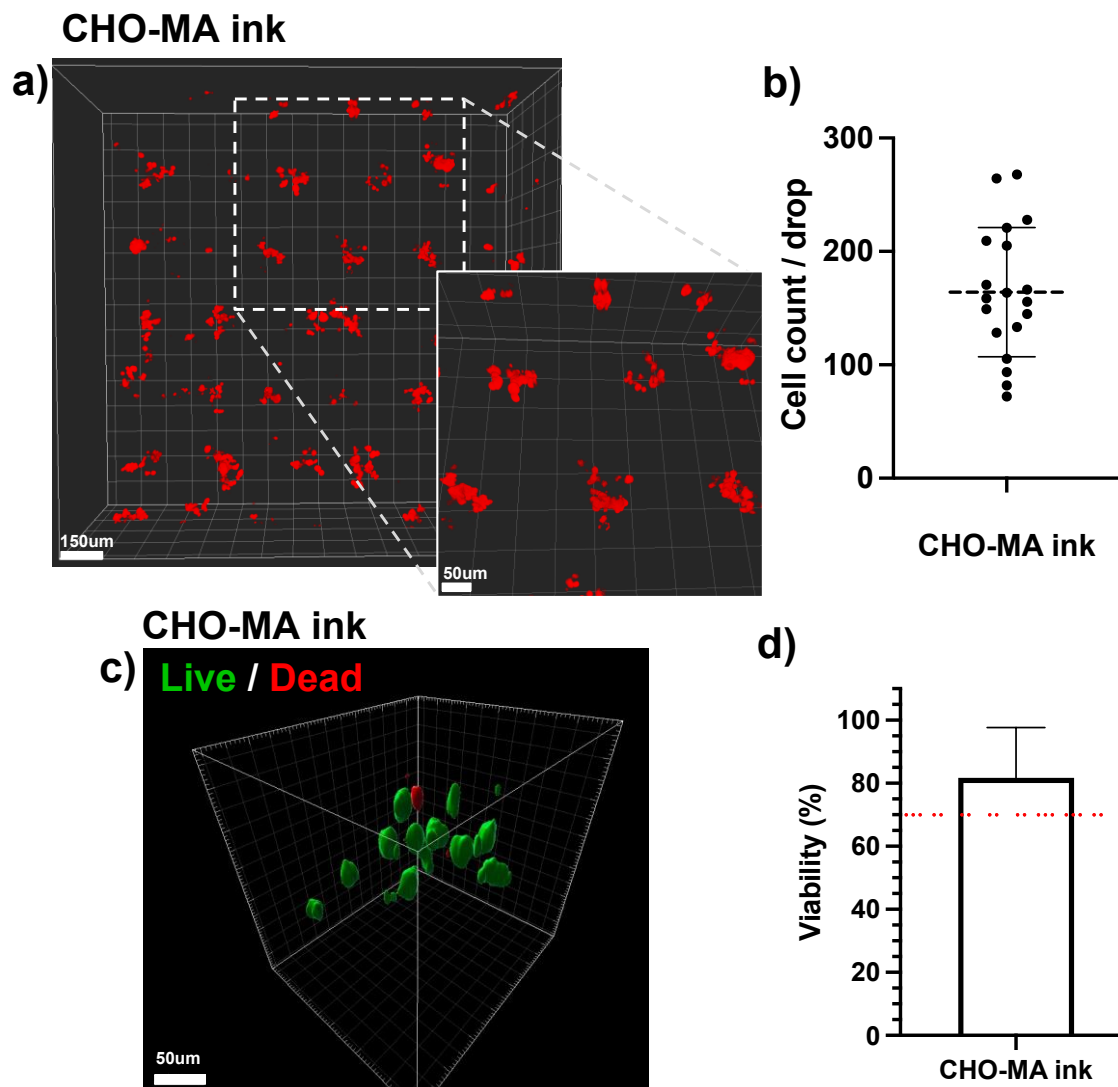

**Figure S7-** a) Confocal imaging of laser assisted bioprinted RFP+ human umbilical vein endothelial cells (HUVECs, red) with methacrylated choric membrane (0.6% w/v, CHO-MA ink), one day post bioprinting. Biomaterial ink contained 0.15 % w/v of photoinitiator LAP. Bioprinting considered the use of the Modulab (Alphanov, France), HUVECs were printed at 70 millions/mL in cell culture medium. Laser-assisted settings considered a 2 nanosecond impulsion, at 25  $\mu$ J per pulse using a far red (1064 nm) nanosecond laser. Cell spots were created every 250  $\mu$ m and projected between two CHO-MA ink layers, followed by a 1 min 365 nm UV photopolymerization, and cultured in EGM-2 MV medium (Lonza, France). b) Cell number by droplet was quantified using image analysis (Imaris) and plotted as cell count per drop (Aver $\pm$ SD). c) Confocal imaging of Live-Dead assay over a representative laser-assisted bioprinted spot of human umbilical vein endothelial cells (HUVECs) bioprinted as described above and at 24 hrs post printing (scale=50  $\mu$ m, Live cells=green, dead cells= red). d) Viability percentage (%) of laser-assisted bioprinted HUVECs at 24 hrs post printing. Briefly, Live-dead assay was performed following staining with calcein-AM (“Live”, 1  $\mu$ L/mL, Invitrogen) and ethidium

homodimer (“Dead”, 4  $\mu\text{L}/\text{mL}$ , Invitrogen) for 20 min. Cell were analyzed by confocal microscopy and analyzed using ImageJ for live (positive for calcein) and dead. “Live” cell percentage was determined (n = 8 replicates,  $\text{Aver} \pm \text{SD}$ ; please note that viability average values higher than 70% viability).

**Table S1 A-** Top core matrisome proteins identified and categorized, % of coverage, number of unique peptides and abundances for amnion and chorion.

| Protein subtype                                     | Protein name                                        | Gene symbol | Coverage [%] | Unique peptides | Abundances (Grouped): Amnion | Abundances (Grouped): Chorion |
|-----------------------------------------------------|-----------------------------------------------------|-------------|--------------|-----------------|------------------------------|-------------------------------|
| Collagen subtypes                                   | Collagen alpha-1(I)                                 | COL1A1      | 43           | 43              | 6.09E+09                     | 5.82E+09                      |
|                                                     | Collagen alpha-2(I)                                 | COL1A2      | 40           | 36              | 4.96E+09                     | 5.85E+09                      |
|                                                     | Collagen alpha-1(II)                                | COL2A1      | 7            | 4               | 1.85E+08                     | 1.89E+08                      |
|                                                     | Collagen alpha-1(III)                               | COL3A1      | 24           | 23              | 1.99E+09                     | 1.16E+09                      |
|                                                     | Collagen alpha-1(IV)                                | COL4A1      | 2            | 2               | 1.17E+06                     | 8.91E+06                      |
|                                                     | Collagen alpha-2(IV)                                | COL4A2      | 10           | 10              | 6.12E+06                     | 5.71E+07                      |
|                                                     | Collagen alpha-1(V)                                 | COL5A1      | 8            | 11              | 2.98E+08                     | 3.53E+08                      |
|                                                     | Collagen alpha-2(V)                                 | COL5A2      | 16           | 5               | 3.17E+07                     | 4.62E+07                      |
|                                                     | Collagen alpha-1(VI)                                | COL6A1      | 4            | 2               | 1.96E+06                     | 3.40E+06                      |
|                                                     | Collagen alpha-2(VI)                                | COL6A2      | 8            | 6               | 7.85E+06                     | 3.85E+07                      |
|                                                     | Collagen alpha-3(VI)                                | COL6A3      | 6            | 18              | 1.49E+08                     | 1.88E+08                      |
|                                                     | Collagen alpha-1(VII)                               | COL7A1      | 1            | 3               | 7.84E+04                     | 5.47E+04                      |
|                                                     | Collagen alpha-1(XI)                                | COL11A1     | 5            | 5               | 1.55E+07                     | 2.61E+07                      |
| Other extracellular matrix proteins                 | Dermatopontin                                       | DPT         | 16           | 3               | 4.20E+04                     | 4.20E+04                      |
|                                                     | EMILIN-2                                            | EMILIN2     | 2            | 2               | 4.73E+04                     | 9.75E+04                      |
|                                                     | Fibrillin-1                                         | FBN1        | 27           | 51              | 1.86E+07                     | 1.18E+08                      |
|                                                     | Fibrillin-2                                         | FBN2        | 5            | 9               | 9.78E+05                     | 8.83E+06                      |
|                                                     | Fibronectin                                         | FN1         | 16           | 27              | 4.81E+06                     | 5.72E+07                      |
|                                                     | Heparan sulfate proteoglycan core protein           | HSPG2       | 1            | 2               | 2.53E+04                     | 3.86E+05                      |
|                                                     | Laminin subunit alpha-2                             | LAMA2       | 1            | 3               | 4.81E+04                     | 3.01E+05                      |
|                                                     | Laminin subunit alpha-5                             | LAMA5       | 1            | 3               | 1.26E+05                     | 5.35E+05                      |
|                                                     | Laminin subunit beta-1                              | LAMB1       | 8            | 5               | 5.78E+05                     | 6.21E+05                      |
|                                                     | Laminin subunit beta-2                              | LAMB2       | 14           | 13              | 3.34E+05                     | 5.86E+06                      |
|                                                     | Laminin subunit gamma-1                             | LAMC1       | 9            | 9               | 1.46E+05                     | 3.47E+06                      |
|                                                     | Tenascin-X                                          | TNXB        | 5            | 13              | 1.36E+06                     | 2.56E+06                      |
|                                                     | Thrombospondin-1                                    | THBS1       | 2            | 2               | 4.25E+04                     | 4.36E+04                      |
| Structural proteins                                 | Agrin                                               | AGRN        | 2            | 3               | 3.33E+04                     | 6.37E+04                      |
|                                                     | Alpha-globin                                        | HBA1        | 19           | 3               | 6.62E+04                     | 4.85E+05                      |
|                                                     | Annexin                                             | ANXA3       | 7            | 2               | 5.26E+06                     | 6.09E+06                      |
|                                                     | Annexin A1                                          | ANXA1       | 38           | 10              | 2.21E+05                     | 7.21E+05                      |
|                                                     | Annexin A2                                          | ANXA2       | 57           | 17              | 4.53E+05                     | 3.93E+06                      |
|                                                     | Annexin A5                                          | ANXA5       | 25           | 6               | 1.71E+05                     | 3.54E+05                      |
|                                                     | Caveolin                                            | CAV1        | 24           | 3               | 6.33E+04                     | 4.68E+05                      |
|                                                     | Derlin-1                                            | DERL1       | 4            | 2               | 3.11E+04                     | 1.45E+04                      |
|                                                     | Desmoglein-1                                        | DSG1        | 3            | 2               | 3.46E+04                     | 1.63E+04                      |
|                                                     | ER lumen protein-retaining receptor 1               | KDEL1       | 20           | 2               | 3.30E+04                     | 1.96E+05                      |
|                                                     | Fibrinogen alpha chain                              | FGA         | 1            | 2               | 4.90E+04                     | 9.60E+05                      |
|                                                     | Fibrinogen beta chain                               | FBG         | 7            | 3               | 7.30E+04                     | 5.75E+05                      |
|                                                     | Filamin-B                                           | FLNB        | 5            | 2               | 3.92E+04                     | 3.73E+04                      |
|                                                     | Gap junction alpha-1 protein                        | GJA1        | 19           | 5               | 1.02E+05                     | 1.03E+06                      |
|                                                     | Glia-derived nexin                                  | SERPINE2    | 24           | 9               | 1.93E+05                     | 8.60E+05                      |
|                                                     | Hemoglobin subunit beta                             | HBB         | 63           | 4               | 8.11E+04                     | 5.12E+05                      |
|                                                     | Histocompatibility 13 isoform 2                     | HM13        | 10           | 4               | 9.62E+04                     | 2.12E+06                      |
|                                                     | Integrin beta                                       | ITGB1       | 6            | 4               | 2.66E+05                     | 4.73E+05                      |
|                                                     | Lysosome-associated membrane glycoprotein 1         | LAMP1       | 10           | 4               | 5.46E+05                     | 4.25E+05                      |
|                                                     | Lysosome-associated membrane glycoprotein 2         | LAMP2       | 5            | 2               | 4.42E+04                     | 1.86E+05                      |
|                                                     | Pituitary tumor-transforming gene 1                 | PTTG1IP     | 14           | 2               | 2.40E+04                     | 5.11E+05                      |
|                                                     | Plectin                                             | PLEC        | 1            | 6               | 2.28E+05                     | 3.67E+06                      |
|                                                     | Prelamin-A/C                                        | LMNA        | 6            | 4               | 6.44E+04                     | 6.49E+04                      |
|                                                     | Prosaposin                                          | PSAP        | 5            | 3               | 3.29E+04                     | 4.19E+04                      |
|                                                     | Sorting and assembly machinery component 50 homolog | SAMM50      | 5            | 2               | 3.32E+04                     | 3.52E+04                      |
|                                                     | Surfeit locus protein 4                             | SURF4       | 14           | 3               | 7.09E+04                     | 8.72E+05                      |
|                                                     | Synaptophysin-like protein 1                        | SYPL1       | 10           | 2               | 6.96E+04                     | 7.15E+05                      |
|                                                     | Transformer-2 protein homolog beta                  | TRA2B       | 10           | 2               | 3.12E+04                     | 2.18E+04                      |
|                                                     | Translocating chain-associated membrane protein 1   | TRAM1       | 6            | 2               | 4.24E+04                     | 3.36E+05                      |
|                                                     | Transmembrane protein 43                            | TMEM43      | 5            | 2               | 9.41E+04                     | 2.21E+05                      |
|                                                     | Tropomyosin 1 (Alpha), isoform CRA_o                | TPM1        | 16           | 3               | 6.46E+04                     | 1.11E+05                      |
|                                                     | Tropomyosin beta chain                              | TPM2        | 12           | 2               | 4.63E+04                     | 5.92E+04                      |
|                                                     | Tubulin alpha chain                                 | TUBA1C      | 5            | 2               | 5.15E+04                     | 1.12E+05                      |
| Voltage-dependent anion-selective channel protein 1 | VDAC1                                               | 80          | 15           | 1.49E+06        | 1.20E+07                     |                               |
| Voltage-dependent anion-selective channel protein 2 | VDAC2                                               | 55          | 11           | 3.42E+05        | 1.71E+07                     |                               |
| Voltage-dependent anion-selective channel protein 3 | VDAC3                                               | 19          | 3            | 3.21E+04        | 5.01E+05                     |                               |

**Table S1 B-** Top core matrisome proteins identified and categorized, % of coverage, number of unique peptides and abundances for amnion and chorion.

| Protein subtype               | Protein name                                                      | Gene symbol | Coverage [%] | Unique peptides | Abundances (Grouped): Amnion | Abundances (Grouped): Chorion |
|-------------------------------|-------------------------------------------------------------------|-------------|--------------|-----------------|------------------------------|-------------------------------|
| Transport protein             | Antigen peptide transporter 1                                     | TAP1        | 4            | 2               | 4.89E+04                     | 1.99E+05                      |
|                               | Apolipoprotein B-100                                              | APOB        | 1            | 5               | 5.70E+04                     | 4.56E+04                      |
|                               | B-cell receptor-associated protein                                | BCAP31      | 13           | 2               | 2.45E+04                     | 7.27E+04                      |
|                               | Choline transporter-like protein 1                                | SLC44A1     | 3            | 2               | 4.62E+04                     | 8.29E+04                      |
|                               | Choline transporter-like protein 2                                | SLC44A2     | 12           | 8               | 1.55E+05                     | 1.43E+06                      |
|                               | Dickkopf-related protein 1                                        | DKK1        | 14           | 4               | 6.95E+04                     | 5.51E+06                      |
|                               | Leukocyte surface antigen CD47                                    | CD47        | 9            | 3               | 6.48E+04                     | 2.38E+05                      |
|                               | Lipocalin-1                                                       | LCN1        | 13           | 2               | 1.44E+05                     | 3.84E+04                      |
|                               | P-type Ca(2+) transporter                                         | ATP2A2      | 5            | 4               | 4.31E+04                     | 3.18E+05                      |
|                               | Phosphate carrier protein, mitochondrial                          | SLC25A3     | 5            | 2               | 5.37E+04                     | 1.07E+05                      |
|                               | Plasma membrane calcium-transporting ATPase 4                     | ATP2B4      | 1            | 2               | 5.13E+04                     | 2.42E+05                      |
|                               | Solute carrier family 2, facilitated glucose transporter member 1 | SLC2A1      | 12           | 3               | 9.77E+04                     | 1.79E+06                      |
|                               | Solute carrier family 2, facilitated glucose transporter member 3 | SLC2A3      | 4            | 2               | 3.69E+04                     | 5.00E+05                      |
| Enzymatic protein             | Acidic mammalian chitinase                                        | CHIA        | 9            | 5               | 4.11E+08                     | 5.48E+07                      |
|                               | Dolichyl-diphosphooligosaccharide--protein glycosyltransferase    | DAD1        | 48           | 5               | 9.78E+04                     | 1.12E+06                      |
|                               | Dolichyl-diphosphooligosaccharide--protein glycosyltransferase    | STT3A       | 6            | 3               | 7.29E+04                     | 5.34E+05                      |
|                               | Glyceraldehyde-3-phosphate dehydrogenase                          | GAPDH       | 8            | 2               | 1.11E+05                     | 2.32E+05                      |
|                               | Metalloproteinase inhibitor 3                                     | TIMP3       | 28           | 6               | 1.52E+05                     | 1.22E+06                      |
|                               | Microsomal glutathione S-transferase 3                            | MGST3       | 18           | 3               | 9.82E+04                     | 1.44E+06                      |
|                               | Prostaglandin E synthase                                          | PTGES       | 30           | 3               | 4.78E+04                     | 1.17E+05                      |
|                               | Protein-glutamine gamma-glutamyltransferase 2                     | TGM2        | 9            | 7               | 1.73E+05                     | 1.14E+06                      |
|                               | Serine protease 1                                                 | PRSS1       | 11           | 2               | 2.18E+07                     | 9.28E+06                      |
| Trypsin-3                     | PRSS3                                                             | 10          | 2            | 9.02E+04        | 3.87E+05                     |                               |
| Contractile protein           | Myosin-10                                                         | MYH10       | 2            | 3               | 1.00E+04                     | 1.47E+05                      |
| Immune System related protein | Alpha-1-antichymotrypsin                                          | SERPINA3    | 29           | 10              | 1.83E+05                     | 2.25E+05                      |
|                               | Antileukoproteinase                                               | SLPI        | 53           | 9               | 6.51E+05                     | 6.79E+06                      |
|                               | C4b-binding protein alpha chain                                   | C4BPA       | 4            | 2               | 5.03E+04                     | 6.07E+04                      |
|                               | Complement component C8 beta chain                                | C8B         | 6            | 3               | 3.26E+04                     | 1.28E+05                      |
|                               | Complement decay-accelerating factor                              | CD55        | 16           | 4               | 4.81E+05                     | 8.16E+05                      |
|                               | Immunoglobulin heavy constant gamma 4                             | IGHG4       | 7            | 2               | 4.83E+04                     | 4.83E+04                      |
|                               | Myeloid-associated differentiation marker                         | MYADM       | 12           | 3               | 1.01E+05                     | 5.52E+06                      |
|                               | Neutrophil defensin 1                                             | DEFA1B      | 26           | 3               | 6.40E+04                     | 1.27E+07                      |
|                               | Norrin                                                            | NDP         | 18           | 2               | 3.37E+04                     | 5.11E+05                      |
|                               | Plasma protease C1 inhibitor                                      | SERPING1    | 12           | 5               | 5.64E+04                     | 5.56E+04                      |
| Protein kish-A                | TMEM167A                                                          | 25          | 2            | 3.94E+04        | 2.88E+05                     |                               |
| Intermediate filament protein | Keratin, type I cytoskeletal 10                                   | KRT10       | 59           | 26              | 6.01E+07                     | 6.20E+07                      |
|                               | Keratin, type I cytoskeletal 14                                   | KRT14       | 29           | 5               | 1.54E+06                     | 5.29E+05                      |
|                               | Keratin, type I cytoskeletal 17                                   | KRT17       | 14           | 2               | 2.73E+04                     | 8.57E+03                      |
|                               | Keratin, type I cytoskeletal 19                                   | KRT19       | 16           | 3               | 6.83E+04                     | 8.34E+05                      |
|                               | Keratin, type I cytoskeletal 9                                    | KRT9        | 73           | 31              | 4.81E+07                     | 4.31E+07                      |
|                               | Keratin, type II cytoskeletal 1                                   | KRT1        | 63           | 2               | 1.30E+07                     | 1.20E+07                      |
|                               | Keratin, type II cytoskeletal 1b                                  | KRT77       | 8            | 2               | 7.31E+06                     | 6.27E+06                      |
|                               | Keratin, type II cytoskeletal 2 epidermal                         | KRT2        | 68           | 27              | 2.37E+07                     | 3.36E+07                      |
|                               | Keratin, type II cytoskeletal 5                                   | KRT5        | 26           | 6               | 2.25E+06                     | 1.89E+06                      |
|                               | Keratin, type II cytoskeletal 6A                                  | KRT6A       | 24           | 3               | 4.80E+05                     | 3.28E+05                      |
| Proteoglycan                  | Bone marrow proteoglycan                                          | PRG2        | 40           | 7               | 2.51E+05                     | 1.94E+07                      |
